# Supplementary material for: C-di-AMP Is a Second Messenger in Corynebacterium glutamicum That Regulates Expression of a Cell Wall-Related Peptidase via a Riboswitch
Source: MDPI journal article supplement (doi:10.3390/microorganisms11020296), 2023-01-23
Supplement: s1 [file s1]

## Supplementary Materials

### 1. Supplementary Methods—Construction of Plasmids

**pBAD33\_*disA-strep*:** The gene *cg2951/disA* was amplified from genomic DNA of *C. glutamicum* using primers *disA\_fw* and *disA-strep\_rv*, introducing a C-terminal Strep-tag. The resulting fragment was ligated to pJET1.2 and verified via sequencing. Then, *disA-strep* was cut from pJET with *SacI* and *KpnI* and ligated to pBAD33 digested with the same enzymes, yielding pBAD33\_*disA-strep*.

**pACYC\_*disA-strep* and pACYC\_*disA'-strep*:** First, a fragment containing the chloramphenicol resistance gene was removed from pACYC184 by restriction digestion with *BsaAI*. A fragment containing *araC*, *P<sub>BAD</sub>* and *disA-strep* was obtained from pBAD33\_*disA-strep* by restriction digestion with *NaeI* and *SmaI*. This fragment was then ligated to the fragment of pACYC184 containing the tetracycline resistance gene as well as the origin of replication, yielding pACYC\_*disA-strep*. The truncation of *disA* was carried out by restriction digestion of pACYC\_*disA-strep* with *PstI*, which cuts twice in *disA*, and subsequent religation. This resulted in an in-frame deletion of 414 bp (138 AA, 38% of the gene/protein), removing parts of the DAC domain as well as the DisA-linker motif.

**pJC1\_*P<sub>cg2402</sub>-cgFbFP*:** To construct a promoter reporter plasmid for monitoring expression of *cg2402/nlpC*, first, 594 bp upstream of the *nlpC* start codon plus 30 bp of the gene itself were amplified from genomic DNA of *C. glutamicum* using primers *Pcg2402\_fw* and *Pcg2402\_rv*. The *cgFbFP* fragment obtained from Eurofins genomics (sequence: Table S2) was cloned into pJET1.2 and subsequently amplified without start codon using primers *cgFbFP'\_fw* and *cgFbFP\_rv*. The target plasmid pJC1 was linearized by restriction digestion with *BamHI*. All three fragments were then assembled in an isothermal reaction to yield pJC1\_*P<sub>cg2402</sub>-cgFbFP*.

**pJYS3\_*dpdeA* and pJYS3\_*dnlpC*:** The plasmids for genomic deletion of *cg2174/pdeA* and *cg2402/nlpC* were constructed based on Jiang *et al.* [52] as follows. Respective sgRNA fragments were obtained from overlap extension PCR using primer *OE\_sg-universal\_fw* together with the respective *rv* primers (table S1). Upstream and downstream regions were amplified using the respective primers from genomic DNA of *C. glutamicum*. The three fragments sgRNA, up-region and do-region were then introduced into *SmaI/SwaI*-digested pJYS3-KH [80] in a single isothermal assembly reaction.

**pXMJ19\_*mCherry*, pXMJ19\_*RSnlpC-mCherry* and pXMJ19\_*RSnlpC-mCherry-mVenus*:** The reporter gene *mCherry* was amplified from pOGduet\_*mCherry* [81] using primers *RBS\_mCherry\_fw* and *mCherry\_rv*. The resulting fragment was sub-cloned into pJET1.2 and sequence as well as introduction in forward orientation were verified via sequencing. The plasmid pJET\_*mCherry* was digested with *XhoI* and *XbaI* and ligated to a *SaII* and *XbaI*-linearized pXMJ19 to yield pXMJ19\_*mCherry*. The putative riboswitch sequence upstream of *cg2402/nlpC* was amplified from genomic DNA of *C. glutamicum* using primers *RSnlpC\_fw* and *RSnlpC\_rv*. The resulting fragment was sub-cloned into pJET1.2 and verified via sequencing. The reporter gene *mCherry* was digested from pJET\_*mCherry* using *BamHI* and *SaII* and ligated to pJET\_*RSnlpC* linearized beforehand with the same enzymes. The resulting plasmid contained the fragment *RSnlpC-mCherry*, which was then obtained by restriction digestion with *XbaI* and *EcoRI* and ligated to pXMJ19 linearized beforehand with the same enzymes to yield pXMJ19\_*RSnlpC-mCherry*. For introduction of the second reporter gene *mVenus* together with a ribosomal binding site downstream of *mCherry*, *mVenus* was amplified using primers *RBS\_mVenus\_fw* and *mVenus\_rv* from pOGduet\_*mVenus* [81]. The PCR-fragment as well as pXMJ19\_*RSnlpC-mCherry* were then digested with *EcoRI* and ligated. Correct orientation and functionality of *mVenus* in the resulting plasmid pXMJ19\_*RSnlpC-mCherry-mVenus* was verified via *mVenus* fluorescence at 530 nm, see main article for measurement details.

**pXMJ19\_*pdeA-strep*:** For recombinant expression of the c-di-AMP phosphodiesterase gene *cg2174/pdeA*, a strep affinity tagged variant was constructed as follows. The putative PDE gene *cg2174* was amplified from genomic DNA of *C. glutamicum* with primers *pdeA\_fw* and *pdeA-strep\_rv*. The resulting fragment was cloned into pJET1.2 and verified via sequencing. The *pdeA-strep* fragment was obtained by restriction digestion of pJET\_*pdeA-strep* with *BamHI* and *KpnI* and subsequently ligated to pXMJ19 linearized with the same enzymes, yielding pXMJ19\_*pdeA-strep*.

## 2. Supplementary Tables

Table S1. Oligonucleotides used in this study<sup>1</sup>.

| Oligonucleotide                                | Sequence (5' → 3') <sup>1</sup>                                                      |
|------------------------------------------------|--------------------------------------------------------------------------------------|
| <b>Expression of <i>disA</i></b>               |                                                                                      |
| disA_fw                                        | GCGCGAGCTC <u>AGGAGA</u> CTATCTATGACACCAACAACCACTCCTGTATCAAAC                        |
| disA-strep_rv                                  | GCTAGGTACCTTATTTTCGAACTGCGGGTGGCTCCAAGCGCTACTTAAACGGCCAAGTCCGTCGG                    |
| <b>Promoter reporter <i>cg2402</i></b>         |                                                                                      |
| Pcg2402_fw                                     | GATCAGCGACGCCGACGGGCAACTTCGCTCAAATTCC                                                |
| Pcg2402_rv                                     | GGAAAGACGCGTTTGAATTGTTGCGACG                                                         |
| cgFbFP'_fw                                     | CAATTCAAACGCGTCTTCCAGAGCTTTG                                                         |
| cgFbFP_rv                                      | GCTGCAGGTCGACTCTAGAGTTATTTCGAGCAGTTCTCTGTAC                                          |
| <b>Deletion of <i>pdeA</i> and <i>nlpC</i></b> |                                                                                      |
| OE_sg-universal_fw                             | GGGCTAGATTGACAGCTAGCTCAGTCTAGGTATAATGGATCCGAATTTCTACTGTTGTAGATCTACAACAGTAGA<br>AATTC |
| OE_sg-pdeA_rv                                  | CTGAGCCTTTCGTTTTATTTAAATCATCGATTAAGTTGACGGCACAT                                      |
| pdeA_up_fw                                     | GCTAGCTGTCAATCTAGCCCCGAGGAGTGGTCCACCATG                                              |
| pdeA_up_rv                                     | ACTCCCCCAAAGCAGCATGAAACTGACTATTATC                                                   |
| pdeA_do_fw                                     | TCATGCTGCTTTGGGGGAGTCTTTGCGAAG                                                       |
| pdeA_do_rv                                     | TGTTACCGGGCCCTCTCCCCGTTGCCAGCCATGATCATG                                              |
| pdeA_out_fw                                    | TTTACCCCGACCTGACTT                                                                   |
| pdeA_out_rv                                    | ATCGCAGCTAGAACACCC                                                                   |
| OE_sg-nlpC_rv                                  | CTGAGCCTTTCGTTTTATTTAAATGAGGTAAGGCCGAGCAGTCATCTACAACAGTAGAAATTC                      |
| nlpC_up_fw                                     | GCTAGCTGTCAATCTAGCCCCAACTAGTGCCGATTTTC                                               |
| nlpC_up_rv                                     | GGAATGGCATGTTTGAATTGTTGCGACG                                                         |
| nlpC_do_fw                                     | CAATTCAAACATGCCATTCCACTCTGCAG                                                        |
| nlpC_do_rv                                     | TGTTACCGGGCCCTCTCCCCGATCCGTGACTGTGCCAC                                               |
| nlpC_out_fw                                    | GTTCTTCGTGAGCATT                                                                     |
| nlpC_out_rv                                    | CTTCTCAGTCTCCGCGTT                                                                   |
| <b>Reporter plasmids mCherry</b>               |                                                                                      |
| RBS_mCherry_fw                                 | GGATCCA <u>AGGAGT</u> TTTCATGGTGAGCAAGGGCGAG                                         |
| mCherry_rv                                     | GATCCGTCGACTTACTTGTACAGCTCGTCC                                                       |
| RSnlpC_fw                                      | CGTAGATCCTGCAGCGCCAGCATTACAGAAAC                                                     |
| RSnlpC_rv                                      | GAATTCGTCGACGGATCCTTCTCCTGTTGCTGACC                                                  |
| RBS_mVenus_fw                                  | AGTCGAATTCA <u>AGGAGT</u> TTTCATGGTGAGCAAGGGCGAGG                                    |
| mVenus_rv                                      | AGTCGAATTCCTACTTGTACAGCTCGTCCATG                                                     |
| <b>Expression of <i>pdeA</i></b>               |                                                                                      |
| pdeA_fw                                        | GCATCGGATCCCACCAGTGACGGATAATAGTCAG                                                   |
| pdeA-strep_rv                                  | GCTAGGTACCTTATTTTCGAACTGCGGGTGGCTCCAAGCGCTGCTCAAAGTCGTTGTTAGACATCGACAT               |
| <b>qPCR</b>                                    |                                                                                      |
| q_mCherry_fw                                   | CAAGCTGAAGGTGACCAA                                                                   |
| q_mCherry_rv                                   | TCAAGTAGTCGGGGATGT                                                                   |
| q_cat_fw                                       | GTGTAGAAACTGCCGAAA                                                                   |
| q_cat_rv                                       | GTGAGCTGGTGATATGGGA                                                                  |

<sup>1</sup>restriction sites are indicated in bold, ribosomal binding sites are underlined.

Table S2. Sequence of synthesized fragment.

| Fragment                                 | Sequence (5' → 3')                                                                                                                                                                                                                                                                                                                                                                                                                           |
|------------------------------------------|----------------------------------------------------------------------------------------------------------------------------------------------------------------------------------------------------------------------------------------------------------------------------------------------------------------------------------------------------------------------------------------------------------------------------------------------|
| <i>cgFbFP</i> for fusion to <i>nlpC'</i> | CGCTCTTCCAGAGCTTTGGGATTCCAGGACAACTGGAAGTGATCAAGAAGGCACCTTGACCATGTTTCGTG<br>TAGGTGTCGTCATCACCGATCCAGCTCTTGAGGACAATCCCATTGTCTACGTCAATCAGGGTTTCGTGCA<br>GATGACCGGCTATGAGACAGAGGAAATTCGGGTAAGAATGCTCGGTTTCTCCAGGGCAAACACACTGA<br>TCCTGCCGAAGTTGACAACATTCGCACTGCGTTGCAGAACAAGAACCAGGTTACGGTGACATCCAGAA<br>CTACAAGAAGGATGGAACCATGTTCTGGAACGAACTGAACATCGATCCTATGGAGATCGAGGACAAAA<br>CCTACTTCGTTGGCATCCAAAACGACATACCAAGCAGAAGGAGTACGAGAACTGCTCGAATAA |

## 3. Supplementary Figures

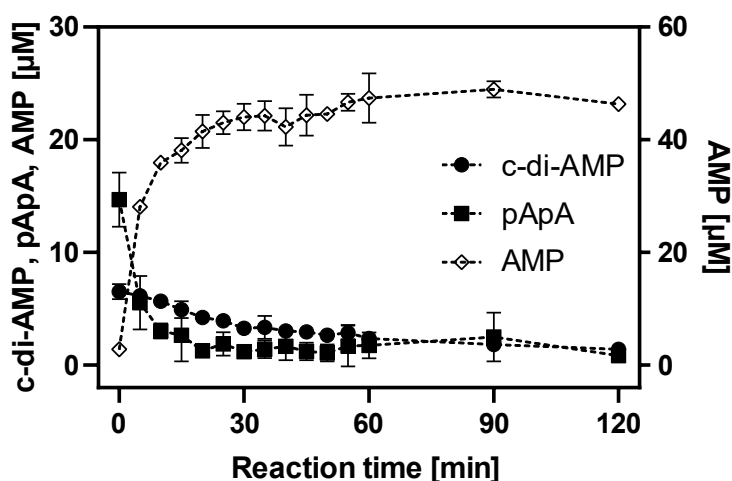

**Figure S1.** PdeA-Strep-mediated degradation of a surplus of 15  $\mu$ M phosphoadenylyl-(3'→5')-adenosine (pApA) in presence of 5  $\mu$ M cyclic diadenosine monophosphate (c-di-AMP) to AMP. PdeA-strep was produced in *E. coli* and enriched via affinity chromatography. PdeA-strep was then incubated at 30 °C with the substrates. Reaction intermediates were quantified via HILIC-HPLC. Shown are mean and SD of N = 3 replicates.

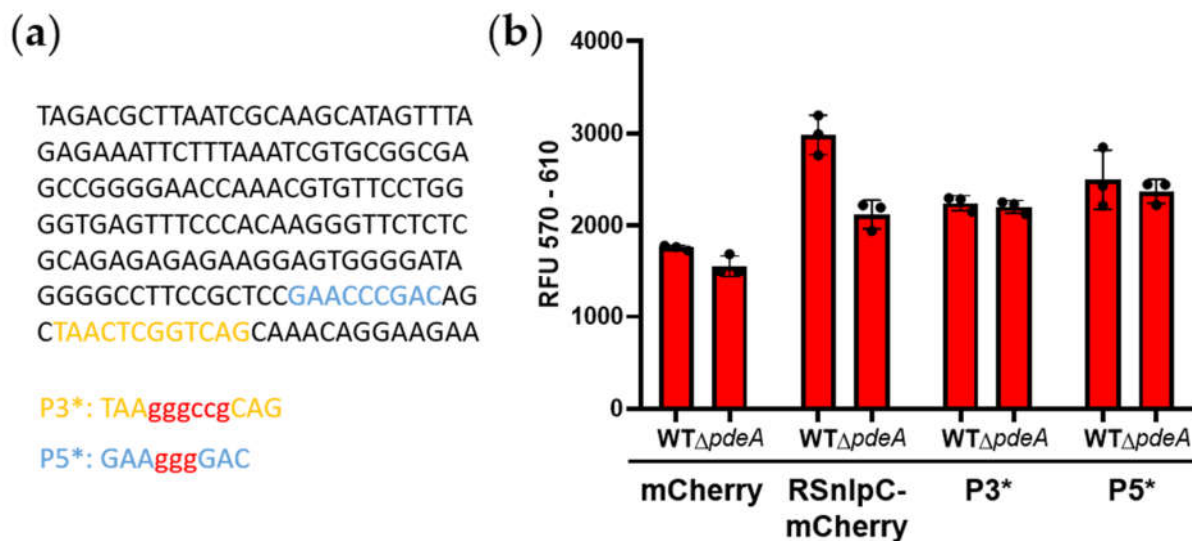

**Figure S2.** Mutations in conserved regions of the riboswitch based on findings by Nelson *et al.* (2013) [26] were introduced into the *mCherry*-reporter plasmid (compare Fig. 3A). (a) overview of introduced mutations. (b) Relative fluorescence of *C. glutamicum* reporter strains showing loss of c-di-AMP dependency of mutated riboswitches. Shown are mean and SD of N = 3 replicates.
